# Supplementary material
Source: PubMed Central journal article supplement (PMC1459033)

# FT-ICR

# LTD

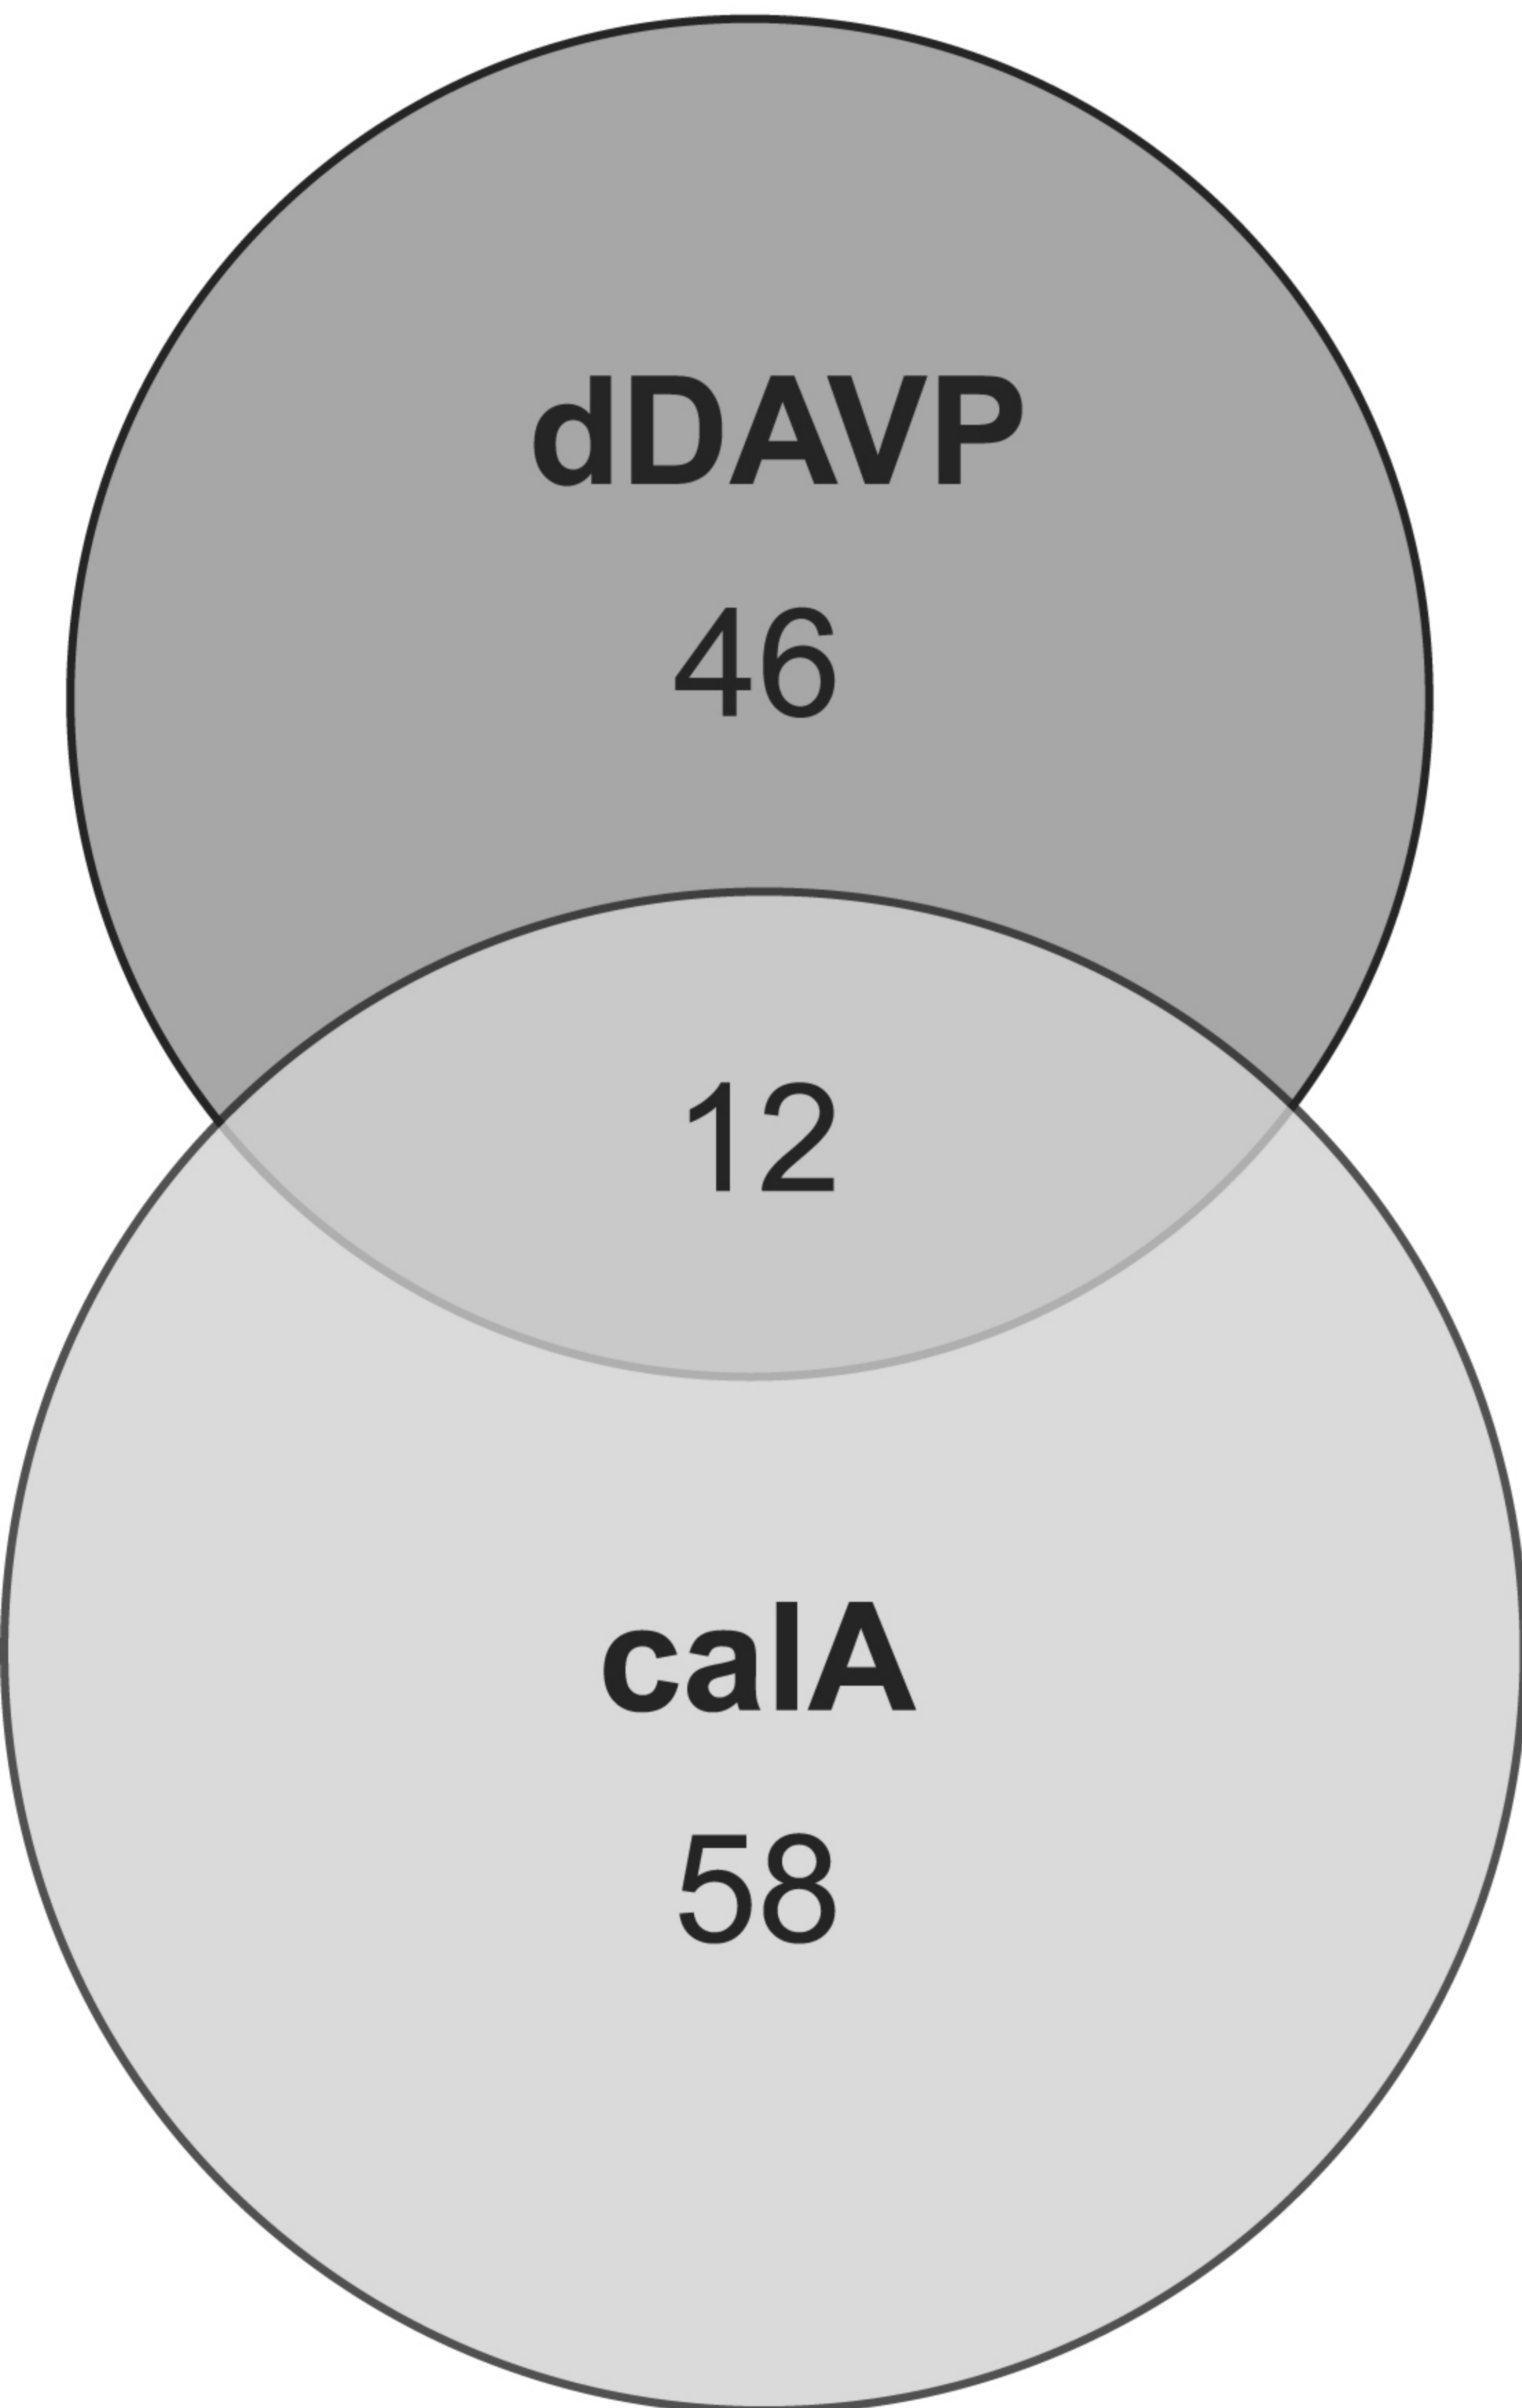

30

38

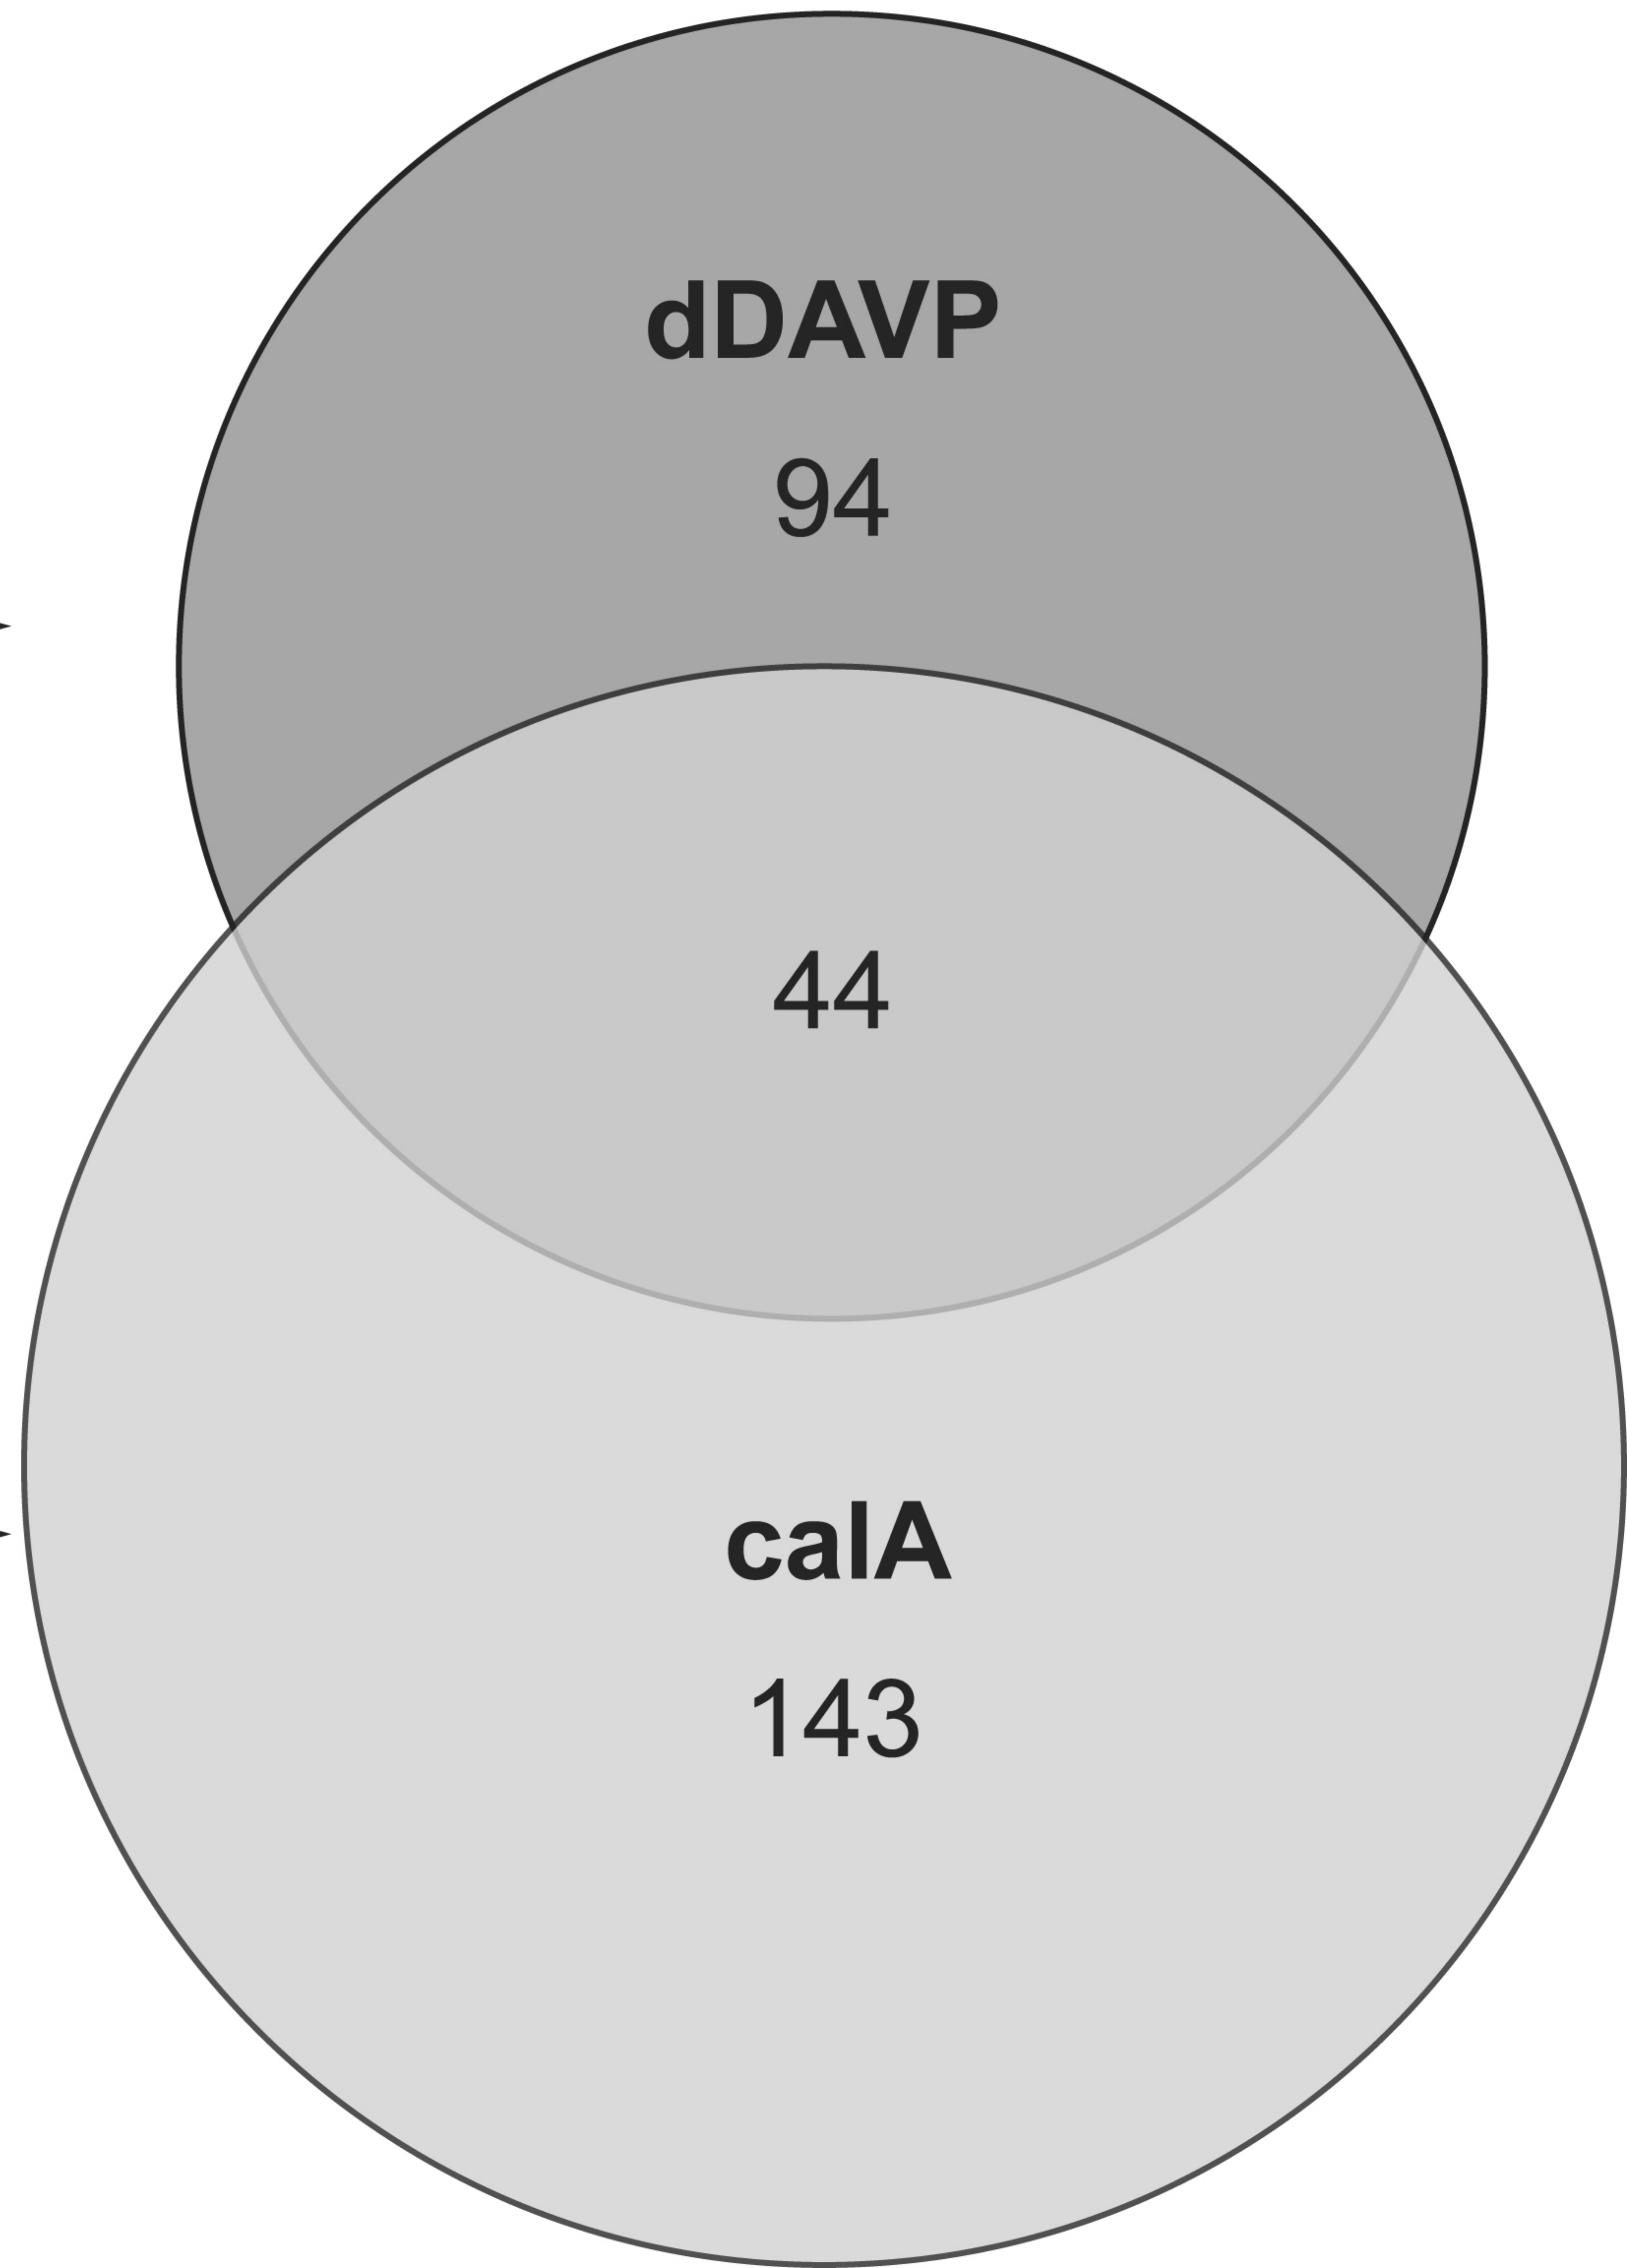

Supplement: pnas_0600895103_1.pdf [file pnas_0600895103_1.pdf]

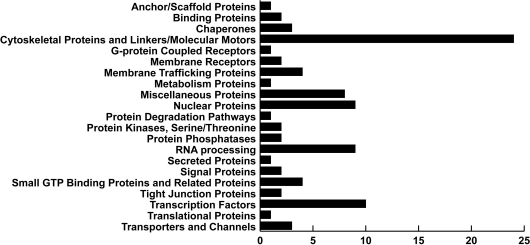

Supplement: pnas_0600895103_2.pdf [file pnas_0600895103_2.pdf]

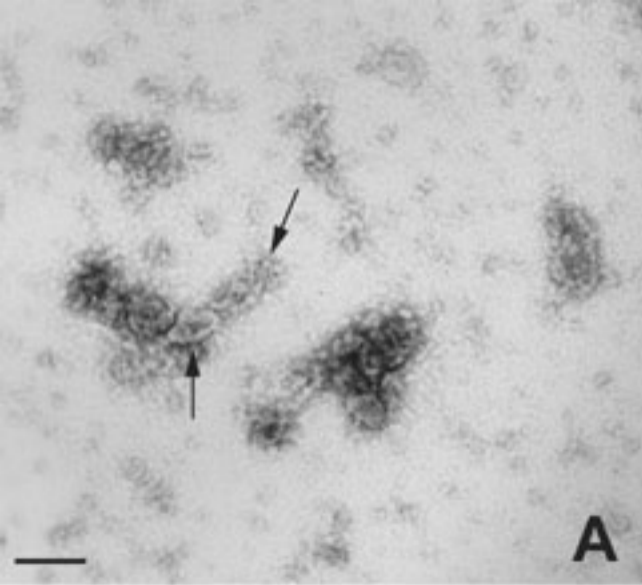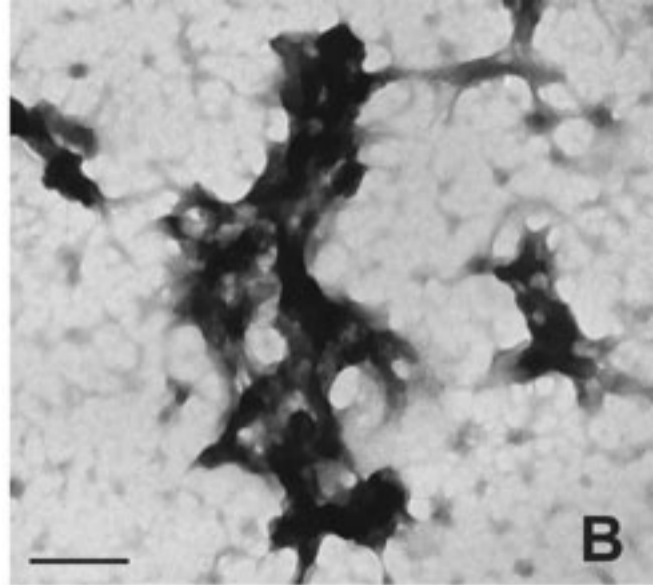

Supplement: pnas_0600895103_3.pdf [file pnas_0600895103_3.pdf]

Raw

Norm

1.57

1.00

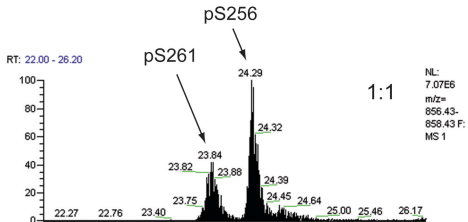

0.74

0.47

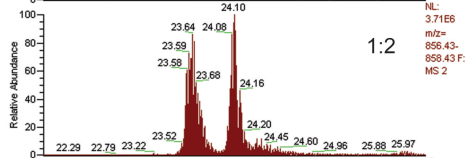

3.07

1.96

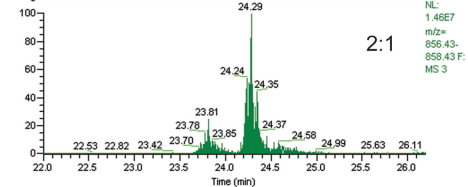

+2

Raw

Norm

1.77

1.00

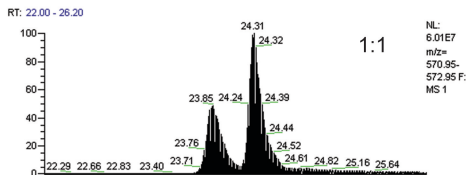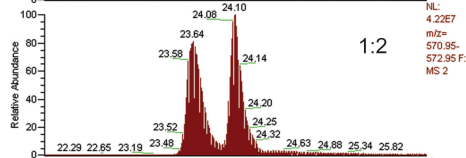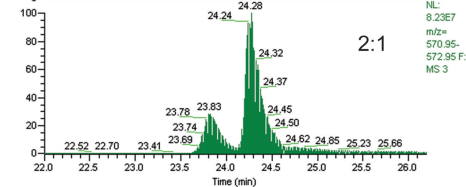

+3

Supplement: pnas_0600895103_4.pdf [file pnas_0600895103_4.pdf]
